# Supplementary material for: Well-Being of Health Care Professionals Treating Opioid Use Disorder During the COVID-19 Pandemic: Results From a National Survey
Source: Atypon-hosted journal article supplement (doi:10.1176/appi.ps.202100080), 2021-08-09
Supplement: appi.ps.202100080.ds001.pdf [file appi.ps.202100080.ds001.pdf]

Online supplement for DOI 10.1176/appi.ps.202100080

*Organizations involved with survey creation and distribution*

| <b>Organization</b>                                                                              | <b>Listserv Subscribership<sup>a</sup></b> |
|--------------------------------------------------------------------------------------------------|--------------------------------------------|
| American Academy of Addiction Psychiatry (AAAP)                                                  | 50,000 <sup>b</sup>                        |
| American Society of Addiction Medicine (ASAM)                                                    | 6,300 <sup>c</sup>                         |
| American Medical Association (AMA)                                                               | 80,000 <sup>c</sup>                        |
| Addiction Technology Transfer Centers (ATTC)                                                     | 20,695 <sup>c</sup>                        |
| American Psychiatric Association (APA)                                                           |                                            |
| American Osteopathic Academy of Addiction Medicine (AOAAM)                                       |                                            |
| Association for Multidisciplinary Education and Research in Substance use and Addiction (AMERSA) |                                            |
| Boston Medical Center/Boston University Medical School                                           |                                            |
| Columbia University/New York State Psychiatric Institute, Division on Substance Use Disorders    |                                            |
| University of Missouri-Kansas City School of Nursing and Health Studies                          |                                            |
| Yale Program in Addiction Medicine                                                               |                                            |

<sup>a</sup> Listserv subscribership includes all listserv members only for organizations who distributed the survey

<sup>b</sup> Approximately 40% of AAAP listserv subscribers are physicians or advanced practice providers (NP or PA)

<sup>c</sup> Percentage of listserv subscribers who are physicians or advanced practice providers is unknown

Pairwise correlations between variables measuring organizational practices/experiences

|                                               |   | No staff changes | Had layoffs/furloughs or reduced hours | Most staff work at home | Staff sick with COVID-19 | Meet as a group to check-in | Feel supported by organization |
|-----------------------------------------------|---|------------------|----------------------------------------|-------------------------|--------------------------|-----------------------------|--------------------------------|
| Had layoffs/furloughs or reduced hours        | r | -0.46            | -                                      | -                       | -                        | -                           | -                              |
|                                               | p | < <b>0.01</b>    | -                                      | -                       | -                        | -                           | -                              |
| Most staff work at home                       | r | -0.10            | 0.01                                   | -                       | -                        | -                           | -                              |
|                                               | p | < <b>0.01</b>    | 0.83                                   | -                       | -                        | -                           | -                              |
| Staff sick with COVID-19                      | r | -0.21            | 0.21                                   | 0.21                    | 0.06                     | -                           | -                              |
|                                               | p | < <b>0.01</b>    | < <b>0.01</b>                          | < <b>0.01</b>           | 0.08                     | -                           | -                              |
| Meet as a group to check-in on staff wellness | r | 0.03             | 0.04                                   | 0.04                    | 0.08                     | 0.13                        | -                              |
|                                               | p | 0.39             | 0.21                                   | 0.21                    | <b>0.02</b>              | < <b>0.01</b>               | -                              |
| Feel supported by organization                | r | -0.01            | 0.08                                   | 0.08                    | 0.09                     | 0.13                        | 0.30                           |
|                                               | p | 0.69             | <b>0.03</b>                            | <b>0.03</b>             | <b>0.01</b>              | < <b>0.01</b>               | < <b>0.01</b>                  |
| Feel closer to patients                       | r | < 0.01           | 0.00                                   | 0.07                    | 0.03                     | 0.19                        | 0.17                           |
|                                               | p | 0.93             | 0.94                                   | 0.06                    | 0.42                     | < <b>0.01</b>               | < <b>0.01</b>                  |

***OUD Provider COVID-19 Survey***

**1. What best describes the setting of your primary clinical practice? (*Select all that apply*)**

- a. Veterans Health Administration, Indian Health Service, private practice, academic medical center, Opioid Treatment Program (OTP), primary care, specialty clinic, emergency setting, prison/jail, Federally Qualified Health Center (FQHC), other \_\_\_\_\_
- b. Rural, urban, suburban, other \_\_\_\_\_
- c. Select: State (Connecticut, etc.)

**2. Which health insurance does the majority of your patients on treatments for opioid use disorder use? (*Choose one*)**

- a. Medicaid
- b. Medicare
- c. Private insurance
- d. Self-pay
- e. Uninsured
- f. Veterans Affairs (VA)
- g. Indian Health Service
- h. Other (e.g. prison)

**3. Select your clinical profession. (*Select all that apply*)**

- a. Psychiatrist
- b. Internal medicine physician
- c. Family medicine physician
- a. Pediatrician
- d. Emergency medicine physician
- e. Physician assistant/associate
- f. Advanced Practice Nurse, Advanced Practice Registered Nurse, or Advanced Registered Nurse Practitioner
- g. Other \_\_\_\_\_

**4. In what year did you complete your medical education?**

**5. Are you board certified in addiction?**

- a. Yes
- b. No

**6. Which medications did you prescribe/order before the COVID-19 (1/31/2020) pandemic to treat opioid use disorder? (*Select all that apply*)**

- a. Methadone, Buprenorphine-naloxone or Buprenorphine mono product, Buprenorphine extended release injection, Buprenorphine implants, Naltrexone extended release injection

7. Which of these medications for treating opioid use disorder do you currently prescribe/order during the pandemic? Select all that apply. (how do they check off—is this a drop down?)
- Methadone, Buprenorphine-naloxone or Buprenorphine mono product, Buprenorphine injection, Buprenorphine implants, Naltrexone injection, oral naltrexone
8. How many years have you been treating patients with opioid use disorder with medications?
- 0-5
  - 6-10
  - 11-15
  - >15 years
9. On average, how many patients did you treat opioid use disorder with medications per month before the pandemic?
- Fewer than 25
  - 26- 50
  - 51- 100
  - More than 100
10. During the pandemic, how many patients per month are you treating with medications for opioid use disorder?
- Fewer than 25
  - 26- 50
  - 51- 100
  - More than 100
11. What challenges has your practice/program faced in providing medications to patients with opioid use disorder due to the COVID-19 pandemic? (Select all that apply)
- Shortage of prescribers of medications for opioid use disorder
    - Due to (**dropdown menu** illness, furlough, layoff, clinical demands elsewhere, inadequate network, prior authorization by payer)
  - Shortage of non-prescriber clinical staff members to support patients/prescribers
    - Due to (**dropdown menu** illness, furlough, layoff, clinical demands elsewhere)
  - Reduced clinical funding (e.g. due to fewer patient visits, reduced reimbursement)
  - Patients with barriers to using telephone (e.g. limited cell phone minutes, connectivity or bandwidth, lack of phones) or knowledge using technology
  - Patients with unstable housing
  - Patients lost to follow-up
  - Difficulty obtaining urine toxicology screens
  - Clinics with limited virtual visit capabilities (ie. No confidential space, no protocols in place, need for social distancing)
  - Changes in local drug supply

- j. Other \_\_\_\_\_
- k. N/A \_\_\_\_\_

**12. What aspects of your clinical practice have been on hold or markedly reduced due to the pandemic? (*Select all that apply*)**

- a. In person visits
- b. In person observed medication administration
- c. Urine toxicology screens
- d. Initiation of medications for opioid use disorder in new patients
- e. Providing injectable medications for opioid use disorder (e.g. naltrexone, buprenorphine)
- f. Other \_\_\_\_\_
- g. No changes

**13. Which of these practices would you like to partially/fully resume after the pandemic?**

**Select all that apply.**

- a. In person visits
- b. In-person observed medication administration
- c. Urine toxicology screens
- d. Initiation of medications for opioid use disorder in new patients
- e. Other \_\_\_\_\_
- f. N/A \_\_\_\_\_

**14. Before the pandemic, did you use any of the following clinical practices? (*Select all that apply*)**

**(in person = in clinic; virtual = phone or video)**

- a. Virtual visits to initiate medications for opioid use disorder
- b. Virtual visits to maintain medications for opioid use disorder
- c. Virtual behavioral health and/or counseling visits
- d. Observed medication administration through video
- e. Urine toxicology screens via mail
- f. Street teams to assess patients/other mobile services
- g. Reimbursement for virtual visit services
- h. Medications mailed to patients
- i. Partnering with a patient surrogate (e.g. for medication pickup)
- j. Naloxone prescription
- k. Online mutual help groups (e.g. AA)
- l. Smartphone counseling apps
- m. Online counseling sites
- n. Other \_\_\_\_\_
- o. N/A \_\_\_\_\_

**15. During the pandemic, which practices have you been using to provide medications for opioid use disorder? (in person = in clinic; virtual = phone or video). (*Select all that apply*)**

- a. Virtual visits to initiate medications for opioid use disorder

- b. Virtual visits to maintain medications for opioid use disorder
- c. Virtual behavioral health and/or counseling visits
- d. Observed medication administration through video
- e. Urine toxicology screens via mail
- f. Expanded access to take-home methadone
- g. Providing longer durations/more refills of prescriptions of medications for opioid use disorder
- h. Street teams to assess patients/other mobile services
- i. Expanded reimbursements for virtual visit services
- j. Expanded use of injectable/implantable buprenorphine or injectable naltrexone
- k. Medications mailed to patients
- l. Partnering with a patient surrogate (e.g. for medication pickup)
- m. Expanded Naloxone prescription
- n. Online mutual help groups (e.g. AA)
- o. Smartphone counseling apps
- p. Online counseling sites
- q. Other \_\_\_\_\_
- r. No changes

**16. Which of these innovations would you like to see continued or expanded after the pandemic? (in person = in clinic; virtual = phone or video). (Select all that apply)**

- a. Virtual visits to initiate medications for opioid use disorder
- b. Virtual visits to maintain medications for opioid use disorder
- c. Virtual behavioral health and/or counseling visits
- d. Observed medication administration through video
- e. Urine toxicology screens via mail
- f. Expanded access to take-home methadone
- g. Providing longer durations/more refills of prescriptions of medications for opioid use disorder
- h. Street teams to assess patients/other mobile services
- i. Expanded reimbursements for virtual visit services
- j. Expanded use of injectable/implantable buprenorphine or injectable naltrexone
- k. Medications mailed to patients
- l. Partnering with a patient surrogate (e.g. for medication pickup)
- m. Expanded Naloxone prescription
- n. Online mutual help groups (e.g. AA)
- o. Smartphone counseling apps
- p. Online counseling sites
- q. Other \_\_\_\_\_
- r. No changes
- s. N/A

**17. As a provider, which pandemic-related clinical practice changes are you satisfied with? (Select all that apply)**

- a. Virtual visits to initiate medications for opioid use disorder
- b. Virtual visits to maintain medications for opioid use disorder

- c. Virtual behavioral health and/or counseling visits
- d. Observed medication administration through video
- e. Urine toxicology screens via mail
- f. Expanded access to take-home methadone
- g. Providing longer durations/more refills of prescriptions of medications for opioid use disorder
- h. Street teams to assess patients/other mobile services
- i. Expanded reimbursements for virtual visit services
- j. Expanded use of injectable/implantable buprenorphine or injectable naltrexone
- k. Medications mailed to patients
- l. Partnering with a patient surrogate (e.g. for medication pickup)
- m. Expanded Naloxone prescription
- n. Online mutual help groups (e.g. AA)
- o. Smartphone counseling apps
- p. Online counseling sites
- q. Other \_\_\_\_\_
- r. No changes

**18. Which pandemic-related changes do you perceive your patients are satisfied with?**

***(Select all that apply)***

- a. Virtual visits to initiate medications for opioid use disorder
- b. Virtual visits to maintain medications for opioid use disorder
- c. Virtual behavioral health and/or counseling visits
- d. Observed medication administration through video
- e. Urine toxicology screens via mail
- f. Expanded access to take-home methadone
- g. Providing longer durations/more refills of prescriptions of medications for opioid use disorder
- h. Street teams to assess patients/other mobile services
- i. Expanded reimbursements for virtual visit services
- j. Expanded use of injectable/implantable buprenorphine or injectable naltrexone
- k. Medications mailed to patients
- l. Partnering with a patient surrogate (e.g. for medication pickup)
- m. Expanded Naloxone prescription
- n. Online mutual help groups (e.g. AA)
- o. Smartphone counseling apps
- p. Online counseling sites
- q. Other \_\_\_\_\_
- r. No changes
- s.

**19. What do you perceive your patients have found beneficial or helpful when providing medications for opioid use disorder during the pandemic? Please describe.**

***(Optional)*** \_\_\_\_\_

**20. Have your patients experienced any of the following adverse events due to pandemic-related changes in clinical practice? *(Select all that apply)***

- a. Medication diversion
- b. Underdosed/missed medication
- c. Medications not taken as prescribed
- d. Increased substance use
- e. Mental health distress
- f. Missed or reduction in time of behavioral health appointments
- g. Overdose
- h. Loss of follow-up
- i. Other \_\_\_\_\_
- j. None

**21. Describe the most common adverse event(s) (Optional) \_\_\_\_\_**

**22. Which of the pandemic-related federal policy changes or new policy changes would you like to be continued after the pandemic? (Select all that apply)**

- a. Medications for opioid use disorder prescriptions (except for initiation of methadone) can be made without requirement of an in-person medical evaluation
- b. Penalties waived for providers that do that comply with HIPAA compliant virtual visit technologies/devices
- c. Providers can prescribe medications for opioid use disorder in states where they do not have an associated medical license
- d. OTP patients may receive 28 days of Take-Home doses of methadone when clinically stable
- e. NPs and PAs can prescribe medications for opioid use disorder in the event a supervising provider can no longer provide supervision
- f. Expanded virtual visit/telehealth privileges and billing
- g. The opportunity for patients to receive office-based methadone
- h. Other \_\_\_\_\_

**23. Provide any changes to staffing and provider wellness you have experienced as a result of COVID-19. (Select all that apply)**

- a. We have not made any changes to the number of staff working at our clinic
- b. We have had some layoffs/furloughs at our clinic
- c. We have reduced some staff hours but no layoffs
- d. All staff work onsite as usual
- e. Most staff work at home
- f. We have had staff members get sick with COVID-19
- g. My anxiety level about COVID-19 has impacted my functioning at home and/or work
- h. I am having a more difficult time than usual balancing work and home life
- i. We meet as a group to check-in on staff wellness
- j. I feel supported by our organization during the COVID-19 pandemic
- k. I feel closer to my patients
- l. Other \_\_\_\_\_
- m. No changes



**24. What of the following resources/organizations have been helpful to your clinical practice during the pandemic? (Select all that apply)**

- a. Addiction Technology Transfer Centers (ATTC)
- b. American Academy of Addiction Psychiatry (AAAP)
- c. American Association for the Treatment of Opioid Dependence (AATOD)
- d. American Osteopathic Academy of Addiction Medicine (AOAAM)
- e. American Psychiatric Association (APA)
- f. American Society of Addiction Medicine (ASAM) guidelines
- g. Association for Multi-disciplinary Education and Research in Substance use and Addiction (AMERSA)
- h. Center for Disease Control (CDC)
- i. Drug Enforcement Administration (DEA)
- j. Listservs/group emails
- k. National Institute on Alcohol Abuse and Alcoholism (NIAAA)
- l. National Institute on Drug Abuse (NIDA)
- m. Opioid Response Network (ORN)
- n. Provider Clinical Support Systems (PCSS)
  - i. Clinical roundtables and webinars
  - ii. Mentoring
- o. Provider colleagues
- p. State or local government agencies
- b. Substance Abuse and Mental Health Services Administration (SAMHSA) COVID-19 guidelines
- c. Twitter/social media
- d. Websites (please specify) \_\_\_\_\_
- e. Other \_\_\_\_\_

**25. What year did you complete your medical education (e.g. from nursing, PA, medical school)? \_\_\_\_\_**

**26. Select your age in years**

- a. <30
- b. 30-39
- c. 40-49
- d. 50-59
- e. 60-69
- f. >70

**27. Select your gender**

- a. Woman
- b. Man
- c. Non-binary/third gender
- d. Transgender
- e. Prefer to self-describe \_\_\_\_\_
- f. Prefer not to say

**28. Select your race/ethnicity. (Select all that apply)**

- a. Asian
- b. Black or African American
- c. Caucasian
- d. Hispanic, Latino or Spanish origin
- e. Middle Eastern or North African
- f. Native American or Alaska Native
- g. Native Hawaiian Pacific Islander
- h. Prefer to self -describe \_\_\_\_\_
- i. Prefer not to answer

**29. If you have experienced any positive experiences in your clinical practice during the pandemic-as a result in policy changes we ask that you share. What lessons have you learned that you would like to share with others? (Optional)**

**30. If you have negative experiences you have had with the pandemic-related policy changes to your clinical practice we ask that you share those. (Optional)**

**31. For the future if you have any policy changes or innovations to expand or improve access to medications for opioid use disorder indicate here. (Optional)**
